# Supplementary material for: Examining the compatibility of collagen and a polythiophene derivative for the preparation of bioactive platforms
Source: Royal Society of Chemistry journal article supplement (doi:10.1039/c4ra13812k), 2015-01-01
Supplement: c4ra13812k1.pdf [file c4ra13812k1.pdf]

# Examining the Compatibility of Collagen and Polythiophene for the Preparation of Bioactive Platforms ....

**Jorge Soto-Delgado,<sup>a,b</sup> Juan Torras,<sup>b,\*</sup> Luis J. del Valle,<sup>c</sup> Francesc Estrany,<sup>d,\*</sup> and Carlos Alemán<sup>c,e,\*</sup>**

*<sup>a</sup> Departamento de Ciencias Químicas, Facultad de Ciencias Exactas, Universidad Andrés Bello, Quillota 980, Viña del Mar, Chile*

*<sup>b</sup> Departament d'Enginyeria Química, Escola d'Enginyeria d'Igualada, Universitat Politècnica de Catalunya, Av. Pla de la Massa 8, Igualada 08700, Spain*

*<sup>c</sup> Departament d'Enginyeria Química, E. T. S. d'Enginyeria Industrial de Barcelona, Universitat Politècnica de Catalunya, Diagonal 647, Barcelona E-08028, Spain*

*<sup>d</sup> Departament d'Enginyeria Química, Escola Universitària d'Enginyeria Tècnica Industrial de Barcelona, Universitat Politècnica de Catalunya, Comte d'Urgell 187, 08036 Barcelona, Spain*

*<sup>e</sup> Center for Research in Nano-Engineering, Universitat Politècnica de Catalunya, Campus Sud, Edifici C', C/Pasqual i Vila s/n, Barcelona E-08028, Spain*

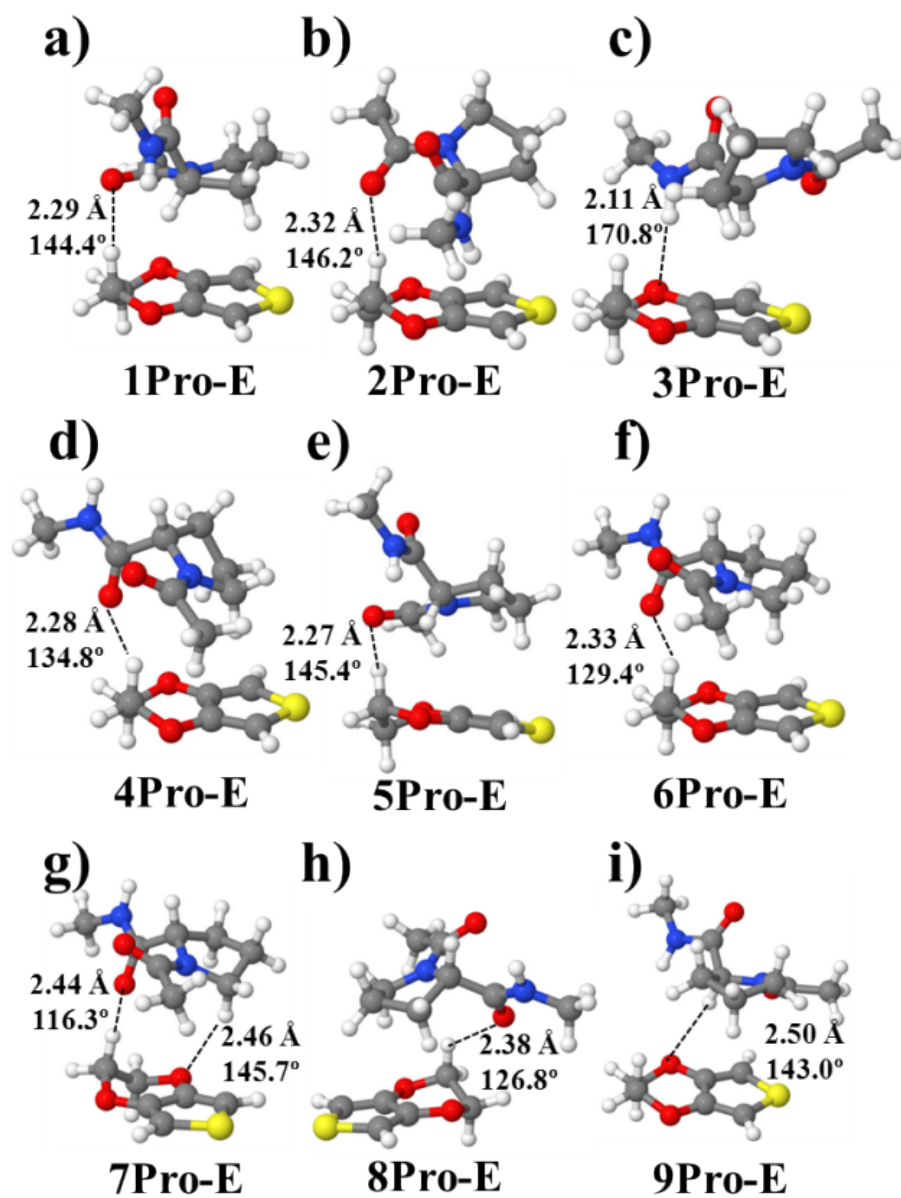

**Figure S1.** Representation of the EDOT...Ac-L-Pro-NMe complexes optimized at the PCM-MP2/6-31+G(d,p) level in chloroform solution. Structural parameters and relative energies are provided in Table 3.

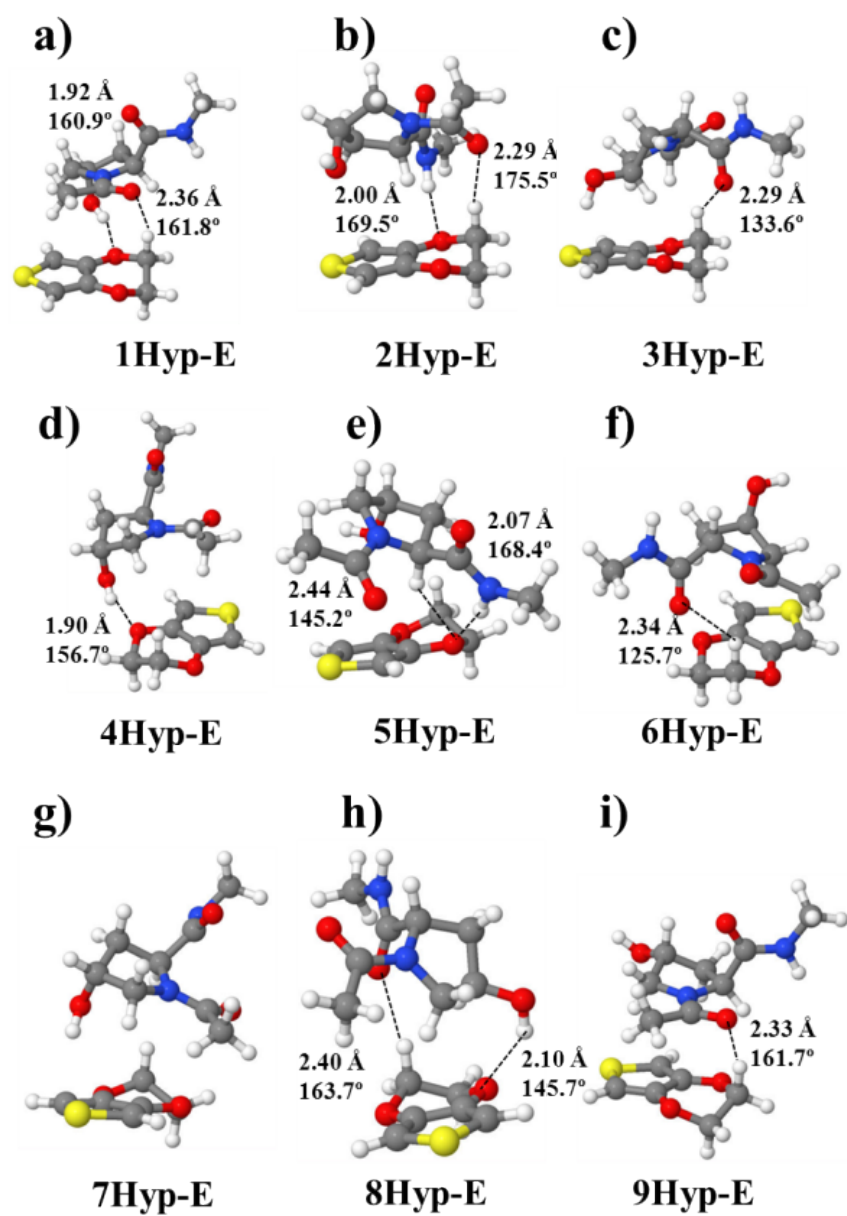

**Figure S2.** Representation of the EDOT...Ac-L-Hyp-NMe complexes optimized at the PCM-MP2/6-31+G(d,p) level in chloroform solution. Structural parameters and relative energies are provided in Table 3.

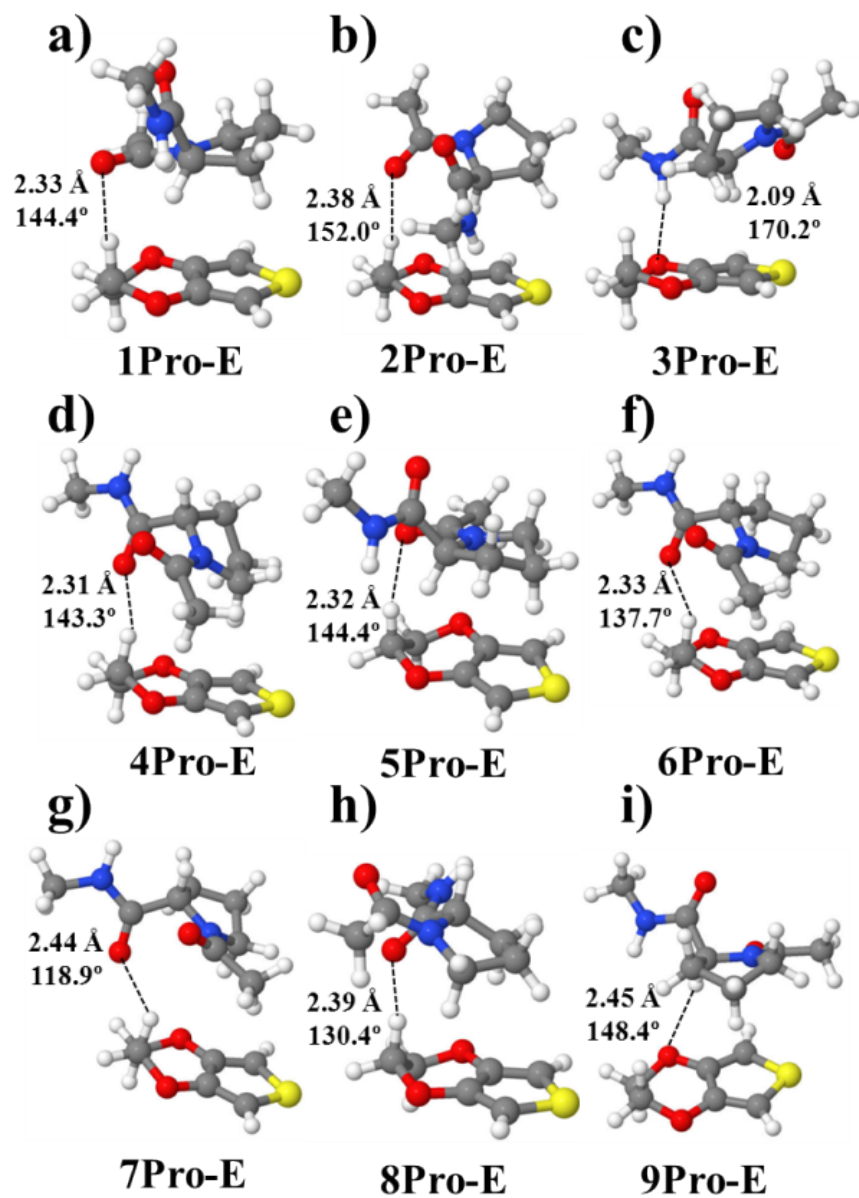

**Figure S3.** Representation of the EDOT...Ac-L-Pro-NMe complexes optimized at the PCM-MP2/6-31+G(d,p) level in water. Structural parameters and relative energies are provided in Table 4.

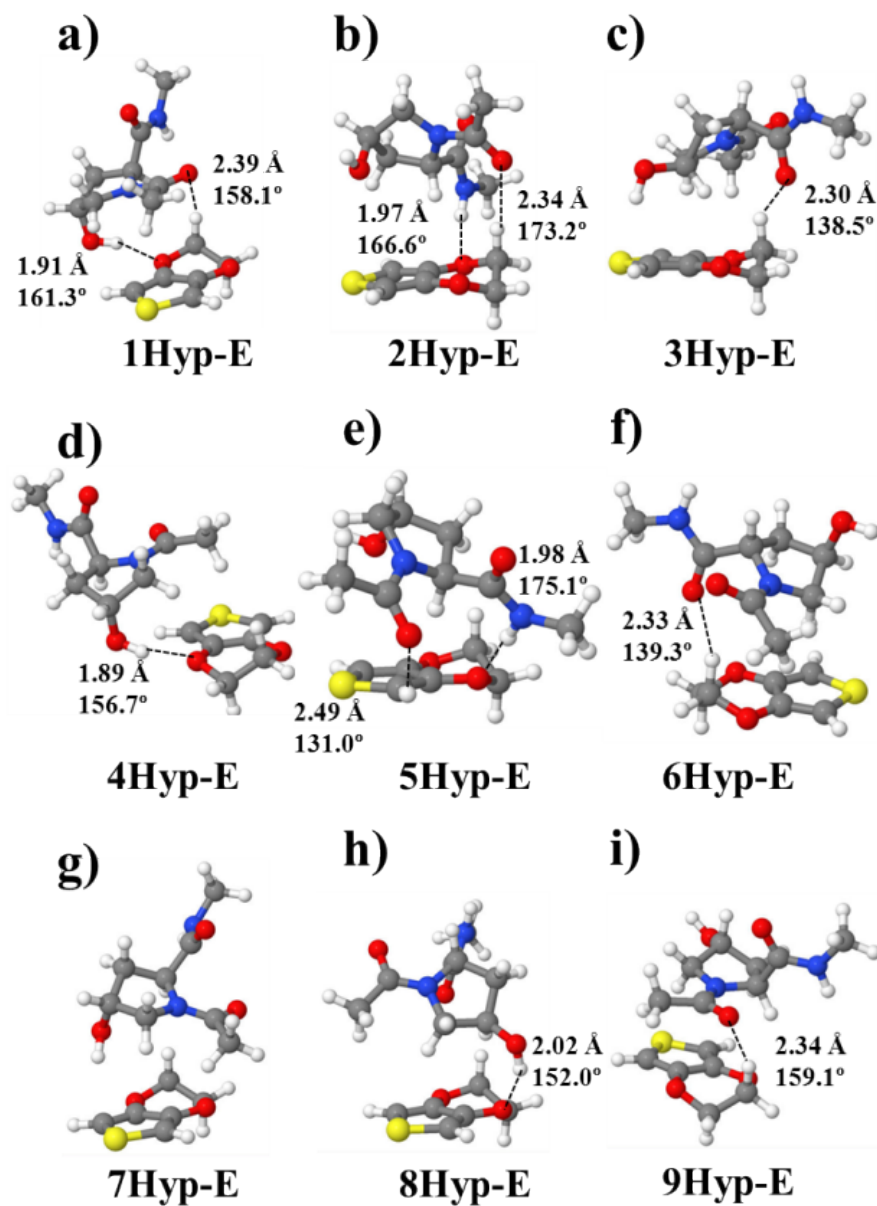

**Figure S4.** Representation of the EDOT...Ac-L-Hyp-NMe complexes optimized at the PCM-MP2/6-31+G(d,p) level in water. Structural parameters and relative energies are provided in Table 4.

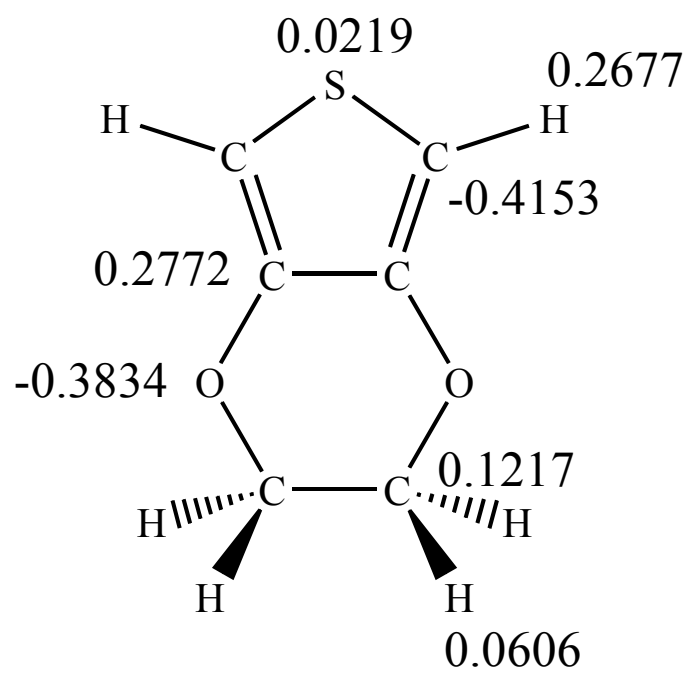

**Figure S5.** ESP charges of EDOT monomer.
